# Supplementary material for: Neural network analysis of clinical variables predicts escalated care in COVID-19 patients: a retrospective study
Source: PubMed Central journal article supplement (PMC8061580; doi:10.7717/peerj.11205), 2021-04-19
Supplement: peerj-09-11205-s001.pdf [file peerj-09-11205-s001.pdf]

## PUI Registry

[Codebook](#)

### Data Dictionary Codebook

05/07/2020 3:01pm

[^ Collapse all instruments](#)

| #                                                                                                 | Variable / Field Name                                                                                 | Field Label<br><i>Field Note</i>                          | Field Attributes (Field Type, Validation, Choices, Calculations, etc.)                                                                                                                                                                                                                                                                                                                              |   |                 |   |                                          |   |                      |   |                               |   |                                           |   |                    |   |                      |
|---------------------------------------------------------------------------------------------------|-------------------------------------------------------------------------------------------------------|-----------------------------------------------------------|-----------------------------------------------------------------------------------------------------------------------------------------------------------------------------------------------------------------------------------------------------------------------------------------------------------------------------------------------------------------------------------------------------|---|-----------------|---|------------------------------------------|---|----------------------|---|-------------------------------|---|-------------------------------------------|---|--------------------|---|----------------------|
| Instrument: <b>Demographics</b> (demographics) <a href="#">^ Collapse</a>                         |                                                                                                       |                                                           |                                                                                                                                                                                                                                                                                                                                                                                                     |   |                 |   |                                          |   |                      |   |                               |   |                                           |   |                    |   |                      |
| 1                                                                                                 | <b>record_id</b>                                                                                      | Record ID                                                 | text, Required                                                                                                                                                                                                                                                                                                                                                                                      |   |                 |   |                                          |   |                      |   |                               |   |                                           |   |                    |   |                      |
| 2                                                                                                 | <b>mrn</b>                                                                                            | MRN                                                       | text (number), Required, Identifier                                                                                                                                                                                                                                                                                                                                                                 |   |                 |   |                                          |   |                      |   |                               |   |                                           |   |                    |   |                      |
| 3                                                                                                 | <b>encounternumber</b>                                                                                | Encounter Number                                          | text (number), Required, Identifier                                                                                                                                                                                                                                                                                                                                                                 |   |                 |   |                                          |   |                      |   |                               |   |                                           |   |                    |   |                      |
| 4                                                                                                 | ethnicity                                                                                             | Ethnicity                                                 | radio, Required<br><table border="1"> <tr><td>1</td><td>Hispanic/Latino</td></tr> <tr><td>2</td><td>Not Hispanic/Latino</td></tr> <tr><td>3</td><td>Unknown/Not Reported</td></tr> </table>                                                                                                                                                                                                         | 1 | Hispanic/Latino | 2 | Not Hispanic/Latino                      | 3 | Unknown/Not Reported |   |                               |   |                                           |   |                    |   |                      |
| 1                                                                                                 | Hispanic/Latino                                                                                       |                                                           |                                                                                                                                                                                                                                                                                                                                                                                                     |   |                 |   |                                          |   |                      |   |                               |   |                                           |   |                    |   |                      |
| 2                                                                                                 | Not Hispanic/Latino                                                                                   |                                                           |                                                                                                                                                                                                                                                                                                                                                                                                     |   |                 |   |                                          |   |                      |   |                               |   |                                           |   |                    |   |                      |
| 3                                                                                                 | Unknown/Not Reported                                                                                  |                                                           |                                                                                                                                                                                                                                                                                                                                                                                                     |   |                 |   |                                          |   |                      |   |                               |   |                                           |   |                    |   |                      |
| 5                                                                                                 | race                                                                                                  | Race                                                      | radio, Required<br><table border="1"> <tr><td>1</td><td>Caucasian</td></tr> <tr><td>2</td><td>African American</td></tr> <tr><td>3</td><td>Asian</td></tr> <tr><td>4</td><td>American Indian/Alaska Native</td></tr> <tr><td>5</td><td>Native Hawaiian or Other Pacific Islander</td></tr> <tr><td>6</td><td>More than One Race</td></tr> <tr><td>7</td><td>Unknown/Not Reported</td></tr> </table> | 1 | Caucasian       | 2 | African American                         | 3 | Asian                | 4 | American Indian/Alaska Native | 5 | Native Hawaiian or Other Pacific Islander | 6 | More than One Race | 7 | Unknown/Not Reported |
| 1                                                                                                 | Caucasian                                                                                             |                                                           |                                                                                                                                                                                                                                                                                                                                                                                                     |   |                 |   |                                          |   |                      |   |                               |   |                                           |   |                    |   |                      |
| 2                                                                                                 | African American                                                                                      |                                                           |                                                                                                                                                                                                                                                                                                                                                                                                     |   |                 |   |                                          |   |                      |   |                               |   |                                           |   |                    |   |                      |
| 3                                                                                                 | Asian                                                                                                 |                                                           |                                                                                                                                                                                                                                                                                                                                                                                                     |   |                 |   |                                          |   |                      |   |                               |   |                                           |   |                    |   |                      |
| 4                                                                                                 | American Indian/Alaska Native                                                                         |                                                           |                                                                                                                                                                                                                                                                                                                                                                                                     |   |                 |   |                                          |   |                      |   |                               |   |                                           |   |                    |   |                      |
| 5                                                                                                 | Native Hawaiian or Other Pacific Islander                                                             |                                                           |                                                                                                                                                                                                                                                                                                                                                                                                     |   |                 |   |                                          |   |                      |   |                               |   |                                           |   |                    |   |                      |
| 6                                                                                                 | More than One Race                                                                                    |                                                           |                                                                                                                                                                                                                                                                                                                                                                                                     |   |                 |   |                                          |   |                      |   |                               |   |                                           |   |                    |   |                      |
| 7                                                                                                 | Unknown/Not Reported                                                                                  |                                                           |                                                                                                                                                                                                                                                                                                                                                                                                     |   |                 |   |                                          |   |                      |   |                               |   |                                           |   |                    |   |                      |
| 6                                                                                                 | domicile                                                                                              | Domicile                                                  | radio, Required<br><table border="1"> <tr><td>1</td><td>Private Home</td></tr> <tr><td>2</td><td>Assisted Living/Skilled Nursing Facility</td></tr> <tr><td>3</td><td>Veterans Home</td></tr> <tr><td>4</td><td>Group Home</td></tr> </table>                                                                                                                                                       | 1 | Private Home    | 2 | Assisted Living/Skilled Nursing Facility | 3 | Veterans Home        | 4 | Group Home                    |   |                                           |   |                    |   |                      |
| 1                                                                                                 | Private Home                                                                                          |                                                           |                                                                                                                                                                                                                                                                                                                                                                                                     |   |                 |   |                                          |   |                      |   |                               |   |                                           |   |                    |   |                      |
| 2                                                                                                 | Assisted Living/Skilled Nursing Facility                                                              |                                                           |                                                                                                                                                                                                                                                                                                                                                                                                     |   |                 |   |                                          |   |                      |   |                               |   |                                           |   |                    |   |                      |
| 3                                                                                                 | Veterans Home                                                                                         |                                                           |                                                                                                                                                                                                                                                                                                                                                                                                     |   |                 |   |                                          |   |                      |   |                               |   |                                           |   |                    |   |                      |
| 4                                                                                                 | Group Home                                                                                            |                                                           |                                                                                                                                                                                                                                                                                                                                                                                                     |   |                 |   |                                          |   |                      |   |                               |   |                                           |   |                    |   |                      |
| 7                                                                                                 | <b>facility_name</b><br>Show the field ONLY if:<br>{domicile}='2' or {domicile}='3' or {domicile}='4' | What is the name of the facility where the patients live? | notes, Required                                                                                                                                                                                                                                                                                                                                                                                     |   |                 |   |                                          |   |                      |   |                               |   |                                           |   |                    |   |                      |
| 8                                                                                                 | demographics_complete                                                                                 | Section Header: <i>Form Status</i><br>Complete?           | dropdown<br><table border="1"> <tr><td>0</td><td>Incomplete</td></tr> <tr><td>1</td><td>Unverified</td></tr> <tr><td>2</td><td>Complete</td></tr> </table>                                                                                                                                                                                                                                          | 0 | Incomplete      | 1 | Unverified                               | 2 | Complete             |   |                               |   |                                           |   |                    |   |                      |
| 0                                                                                                 | Incomplete                                                                                            |                                                           |                                                                                                                                                                                                                                                                                                                                                                                                     |   |                 |   |                                          |   |                      |   |                               |   |                                           |   |                    |   |                      |
| 1                                                                                                 | Unverified                                                                                            |                                                           |                                                                                                                                                                                                                                                                                                                                                                                                     |   |                 |   |                                          |   |                      |   |                               |   |                                           |   |                    |   |                      |
| 2                                                                                                 | Complete                                                                                              |                                                           |                                                                                                                                                                                                                                                                                                                                                                                                     |   |                 |   |                                          |   |                      |   |                               |   |                                           |   |                    |   |                      |
| Instrument: <b>Symptoms At Presentation</b> (symptoms_at_presentation) <a href="#">^ Collapse</a> |                                                                                                       |                                                           |                                                                                                                                                                                                                                                                                                                                                                                                     |   |                 |   |                                          |   |                      |   |                               |   |                                           |   |                    |   |                      |
| 9                                                                                                 | date_of_presentation                                                                                  | Date of Presentation                                      | text (date_mdy)                                                                                                                                                                                                                                                                                                                                                                                     |   |                 |   |                                          |   |                      |   |                               |   |                                           |   |                    |   |                      |
| 10                                                                                                | onset_known                                                                                           | Is approximate date of symptom onset known?               | yesno, Required<br><table border="1"> <tr><td>1</td><td>Yes</td></tr> <tr><td>0</td><td>No</td></tr> </table>                                                                                                                                                                                                                                                                                       | 1 | Yes             | 0 | No                                       |   |                      |   |                               |   |                                           |   |                    |   |                      |
| 1                                                                                                 | Yes                                                                                                   |                                                           |                                                                                                                                                                                                                                                                                                                                                                                                     |   |                 |   |                                          |   |                      |   |                               |   |                                           |   |                    |   |                      |
| 0                                                                                                 | No                                                                                                    |                                                           |                                                                                                                                                                                                                                                                                                                                                                                                     |   |                 |   |                                          |   |                      |   |                               |   |                                           |   |                    |   |                      |
| 11                                                                                                | <b>date_symptom_onset</b><br>Show the field ONLY if:<br>[onset_known] = '1'                           | Date of Symptom Onset                                     | text (date_mdy), Required                                                                                                                                                                                                                                                                                                                                                                           |   |                 |   |                                          |   |                      |   |                               |   |                                           |   |                    |   |                      |

|    |                                                                     |                                                                       |                                                                                                                                                                                                                                                                                                                                                                                                                                                                                                                                                                                                                                                                                                                                                                                                                                                                                                                                                                                                                            |   |             |                          |             |             |                                    |   |             |     |       |             |                      |   |             |        |                 |             |         |   |             |          |   |             |                    |    |              |             |    |              |                             |    |              |               |    |              |               |    |              |          |    |              |                              |   |             |              |
|----|---------------------------------------------------------------------|-----------------------------------------------------------------------|----------------------------------------------------------------------------------------------------------------------------------------------------------------------------------------------------------------------------------------------------------------------------------------------------------------------------------------------------------------------------------------------------------------------------------------------------------------------------------------------------------------------------------------------------------------------------------------------------------------------------------------------------------------------------------------------------------------------------------------------------------------------------------------------------------------------------------------------------------------------------------------------------------------------------------------------------------------------------------------------------------------------------|---|-------------|--------------------------|-------------|-------------|------------------------------------|---|-------------|-----|-------|-------------|----------------------|---|-------------|--------|-----------------|-------------|---------|---|-------------|----------|---|-------------|--------------------|----|--------------|-------------|----|--------------|-----------------------------|----|--------------|---------------|----|--------------|---------------|----|--------------|----------|----|--------------|------------------------------|---|-------------|--------------|
| 12 | symptoms                                                            | Symptoms (check all that apply)                                       | checkbox, Required<br><table border="1"> <tr><td>1</td><td>symptoms__1</td><td>Fever (patient reported)</td></tr> <tr><td>2</td><td>symptoms__2</td><td>Cough</td></tr> <tr><td>3</td><td>symptoms__3</td><td>SOB</td></tr> <tr><td>4</td><td>symptoms__4</td><td>Fatigue</td></tr> <tr><td>5</td><td>symptoms__5</td><td>Sputum</td></tr> <tr><td>6</td><td>symptoms__6</td><td>Myalgia</td></tr> <tr><td>7</td><td>symptoms__7</td><td>Diarrhea</td></tr> <tr><td>8</td><td>symptoms__8</td><td>Nausea or vomiting</td></tr> <tr><td>10</td><td>symptoms__10</td><td>Sore throat</td></tr> <tr><td>11</td><td>symptoms__11</td><td>Runny nose/nasal congestion</td></tr> <tr><td>12</td><td>symptoms__12</td><td>Loss of smell</td></tr> <tr><td>13</td><td>symptoms__13</td><td>Loss of taste</td></tr> <tr><td>14</td><td>symptoms__14</td><td>Headache</td></tr> <tr><td>15</td><td>symptoms__15</td><td>chest discomfort, chest pain</td></tr> <tr><td>9</td><td>symptoms__9</td><td>Asymptomatic</td></tr> </table> | 1 | symptoms__1 | Fever (patient reported) | 2           | symptoms__2 | Cough                              | 3 | symptoms__3 | SOB | 4     | symptoms__4 | Fatigue              | 5 | symptoms__5 | Sputum | 6               | symptoms__6 | Myalgia | 7 | symptoms__7 | Diarrhea | 8 | symptoms__8 | Nausea or vomiting | 10 | symptoms__10 | Sore throat | 11 | symptoms__11 | Runny nose/nasal congestion | 12 | symptoms__12 | Loss of smell | 13 | symptoms__13 | Loss of taste | 14 | symptoms__14 | Headache | 15 | symptoms__15 | chest discomfort, chest pain | 9 | symptoms__9 | Asymptomatic |
| 1  | symptoms__1                                                         | Fever (patient reported)                                              |                                                                                                                                                                                                                                                                                                                                                                                                                                                                                                                                                                                                                                                                                                                                                                                                                                                                                                                                                                                                                            |   |             |                          |             |             |                                    |   |             |     |       |             |                      |   |             |        |                 |             |         |   |             |          |   |             |                    |    |              |             |    |              |                             |    |              |               |    |              |               |    |              |          |    |              |                              |   |             |              |
| 2  | symptoms__2                                                         | Cough                                                                 |                                                                                                                                                                                                                                                                                                                                                                                                                                                                                                                                                                                                                                                                                                                                                                                                                                                                                                                                                                                                                            |   |             |                          |             |             |                                    |   |             |     |       |             |                      |   |             |        |                 |             |         |   |             |          |   |             |                    |    |              |             |    |              |                             |    |              |               |    |              |               |    |              |          |    |              |                              |   |             |              |
| 3  | symptoms__3                                                         | SOB                                                                   |                                                                                                                                                                                                                                                                                                                                                                                                                                                                                                                                                                                                                                                                                                                                                                                                                                                                                                                                                                                                                            |   |             |                          |             |             |                                    |   |             |     |       |             |                      |   |             |        |                 |             |         |   |             |          |   |             |                    |    |              |             |    |              |                             |    |              |               |    |              |               |    |              |          |    |              |                              |   |             |              |
| 4  | symptoms__4                                                         | Fatigue                                                               |                                                                                                                                                                                                                                                                                                                                                                                                                                                                                                                                                                                                                                                                                                                                                                                                                                                                                                                                                                                                                            |   |             |                          |             |             |                                    |   |             |     |       |             |                      |   |             |        |                 |             |         |   |             |          |   |             |                    |    |              |             |    |              |                             |    |              |               |    |              |               |    |              |          |    |              |                              |   |             |              |
| 5  | symptoms__5                                                         | Sputum                                                                |                                                                                                                                                                                                                                                                                                                                                                                                                                                                                                                                                                                                                                                                                                                                                                                                                                                                                                                                                                                                                            |   |             |                          |             |             |                                    |   |             |     |       |             |                      |   |             |        |                 |             |         |   |             |          |   |             |                    |    |              |             |    |              |                             |    |              |               |    |              |               |    |              |          |    |              |                              |   |             |              |
| 6  | symptoms__6                                                         | Myalgia                                                               |                                                                                                                                                                                                                                                                                                                                                                                                                                                                                                                                                                                                                                                                                                                                                                                                                                                                                                                                                                                                                            |   |             |                          |             |             |                                    |   |             |     |       |             |                      |   |             |        |                 |             |         |   |             |          |   |             |                    |    |              |             |    |              |                             |    |              |               |    |              |               |    |              |          |    |              |                              |   |             |              |
| 7  | symptoms__7                                                         | Diarrhea                                                              |                                                                                                                                                                                                                                                                                                                                                                                                                                                                                                                                                                                                                                                                                                                                                                                                                                                                                                                                                                                                                            |   |             |                          |             |             |                                    |   |             |     |       |             |                      |   |             |        |                 |             |         |   |             |          |   |             |                    |    |              |             |    |              |                             |    |              |               |    |              |               |    |              |          |    |              |                              |   |             |              |
| 8  | symptoms__8                                                         | Nausea or vomiting                                                    |                                                                                                                                                                                                                                                                                                                                                                                                                                                                                                                                                                                                                                                                                                                                                                                                                                                                                                                                                                                                                            |   |             |                          |             |             |                                    |   |             |     |       |             |                      |   |             |        |                 |             |         |   |             |          |   |             |                    |    |              |             |    |              |                             |    |              |               |    |              |               |    |              |          |    |              |                              |   |             |              |
| 10 | symptoms__10                                                        | Sore throat                                                           |                                                                                                                                                                                                                                                                                                                                                                                                                                                                                                                                                                                                                                                                                                                                                                                                                                                                                                                                                                                                                            |   |             |                          |             |             |                                    |   |             |     |       |             |                      |   |             |        |                 |             |         |   |             |          |   |             |                    |    |              |             |    |              |                             |    |              |               |    |              |               |    |              |          |    |              |                              |   |             |              |
| 11 | symptoms__11                                                        | Runny nose/nasal congestion                                           |                                                                                                                                                                                                                                                                                                                                                                                                                                                                                                                                                                                                                                                                                                                                                                                                                                                                                                                                                                                                                            |   |             |                          |             |             |                                    |   |             |     |       |             |                      |   |             |        |                 |             |         |   |             |          |   |             |                    |    |              |             |    |              |                             |    |              |               |    |              |               |    |              |          |    |              |                              |   |             |              |
| 12 | symptoms__12                                                        | Loss of smell                                                         |                                                                                                                                                                                                                                                                                                                                                                                                                                                                                                                                                                                                                                                                                                                                                                                                                                                                                                                                                                                                                            |   |             |                          |             |             |                                    |   |             |     |       |             |                      |   |             |        |                 |             |         |   |             |          |   |             |                    |    |              |             |    |              |                             |    |              |               |    |              |               |    |              |          |    |              |                              |   |             |              |
| 13 | symptoms__13                                                        | Loss of taste                                                         |                                                                                                                                                                                                                                                                                                                                                                                                                                                                                                                                                                                                                                                                                                                                                                                                                                                                                                                                                                                                                            |   |             |                          |             |             |                                    |   |             |     |       |             |                      |   |             |        |                 |             |         |   |             |          |   |             |                    |    |              |             |    |              |                             |    |              |               |    |              |               |    |              |          |    |              |                              |   |             |              |
| 14 | symptoms__14                                                        | Headache                                                              |                                                                                                                                                                                                                                                                                                                                                                                                                                                                                                                                                                                                                                                                                                                                                                                                                                                                                                                                                                                                                            |   |             |                          |             |             |                                    |   |             |     |       |             |                      |   |             |        |                 |             |         |   |             |          |   |             |                    |    |              |             |    |              |                             |    |              |               |    |              |               |    |              |          |    |              |                              |   |             |              |
| 15 | symptoms__15                                                        | chest discomfort, chest pain                                          |                                                                                                                                                                                                                                                                                                                                                                                                                                                                                                                                                                                                                                                                                                                                                                                                                                                                                                                                                                                                                            |   |             |                          |             |             |                                    |   |             |     |       |             |                      |   |             |        |                 |             |         |   |             |          |   |             |                    |    |              |             |    |              |                             |    |              |               |    |              |               |    |              |          |    |              |                              |   |             |              |
| 9  | symptoms__9                                                         | Asymptomatic                                                          |                                                                                                                                                                                                                                                                                                                                                                                                                                                                                                                                                                                                                                                                                                                                                                                                                                                                                                                                                                                                                            |   |             |                          |             |             |                                    |   |             |     |       |             |                      |   |             |        |                 |             |         |   |             |          |   |             |                    |    |              |             |    |              |                             |    |              |               |    |              |               |    |              |          |    |              |                              |   |             |              |
| 13 | covid_at_presentation                                               | Is the patient presenting with a known positive COVID 19 test result? | yesno, Required<br><table border="1"> <tr><td>1</td><td>Yes</td></tr> <tr><td>0</td><td>No</td></tr> </table>                                                                                                                                                                                                                                                                                                                                                                                                                                                                                                                                                                                                                                                                                                                                                                                                                                                                                                              | 1 | Yes         | 0                        | No          |             |                                    |   |             |     |       |             |                      |   |             |        |                 |             |         |   |             |          |   |             |                    |    |              |             |    |              |                             |    |              |               |    |              |               |    |              |          |    |              |                              |   |             |              |
| 1  | Yes                                                                 |                                                                       |                                                                                                                                                                                                                                                                                                                                                                                                                                                                                                                                                                                                                                                                                                                                                                                                                                                                                                                                                                                                                            |   |             |                          |             |             |                                    |   |             |     |       |             |                      |   |             |        |                 |             |         |   |             |          |   |             |                    |    |              |             |    |              |                             |    |              |               |    |              |               |    |              |          |    |              |                              |   |             |              |
| 0  | No                                                                  |                                                                       |                                                                                                                                                                                                                                                                                                                                                                                                                                                                                                                                                                                                                                                                                                                                                                                                                                                                                                                                                                                                                            |   |             |                          |             |             |                                    |   |             |     |       |             |                      |   |             |        |                 |             |         |   |             |          |   |             |                    |    |              |             |    |              |                             |    |              |               |    |              |               |    |              |          |    |              |                              |   |             |              |
| 14 | travel_yn                                                           | Recent Travel?                                                        | yesno, Required<br><table border="1"> <tr><td>1</td><td>Yes</td></tr> <tr><td>0</td><td>No</td></tr> </table>                                                                                                                                                                                                                                                                                                                                                                                                                                                                                                                                                                                                                                                                                                                                                                                                                                                                                                              | 1 | Yes         | 0                        | No          |             |                                    |   |             |     |       |             |                      |   |             |        |                 |             |         |   |             |          |   |             |                    |    |              |             |    |              |                             |    |              |               |    |              |               |    |              |          |    |              |                              |   |             |              |
| 1  | Yes                                                                 |                                                                       |                                                                                                                                                                                                                                                                                                                                                                                                                                                                                                                                                                                                                                                                                                                                                                                                                                                                                                                                                                                                                            |   |             |                          |             |             |                                    |   |             |     |       |             |                      |   |             |        |                 |             |         |   |             |          |   |             |                    |    |              |             |    |              |                             |    |              |               |    |              |               |    |              |          |    |              |                              |   |             |              |
| 0  | No                                                                  |                                                                       |                                                                                                                                                                                                                                                                                                                                                                                                                                                                                                                                                                                                                                                                                                                                                                                                                                                                                                                                                                                                                            |   |             |                          |             |             |                                    |   |             |     |       |             |                      |   |             |        |                 |             |         |   |             |          |   |             |                    |    |              |             |    |              |                             |    |              |               |    |              |               |    |              |          |    |              |                              |   |             |              |
| 15 | travel_where<br>Show the field ONLY if: [travel_yn] = '1'           | Where did patient travel?                                             | radio, Required<br><table border="1"> <tr><td>1</td><td>China</td></tr> <tr><td>2</td><td>South Korea</td></tr> <tr><td>3</td><td>Asia (besides China &amp; South Korea)</td></tr> <tr><td>4</td><td>Iran</td></tr> <tr><td>5</td><td>Italy</td></tr> <tr><td>6</td><td>Europe besides Italy</td></tr> <tr><td>7</td><td>Other</td></tr> <tr><td>8</td><td>Domestic Travel</td></tr> </table>                                                                                                                                                                                                                                                                                                                                                                                                                                                                                                                                                                                                                              | 1 | China       | 2                        | South Korea | 3           | Asia (besides China & South Korea) | 4 | Iran        | 5   | Italy | 6           | Europe besides Italy | 7 | Other       | 8      | Domestic Travel |             |         |   |             |          |   |             |                    |    |              |             |    |              |                             |    |              |               |    |              |               |    |              |          |    |              |                              |   |             |              |
| 1  | China                                                               |                                                                       |                                                                                                                                                                                                                                                                                                                                                                                                                                                                                                                                                                                                                                                                                                                                                                                                                                                                                                                                                                                                                            |   |             |                          |             |             |                                    |   |             |     |       |             |                      |   |             |        |                 |             |         |   |             |          |   |             |                    |    |              |             |    |              |                             |    |              |               |    |              |               |    |              |          |    |              |                              |   |             |              |
| 2  | South Korea                                                         |                                                                       |                                                                                                                                                                                                                                                                                                                                                                                                                                                                                                                                                                                                                                                                                                                                                                                                                                                                                                                                                                                                                            |   |             |                          |             |             |                                    |   |             |     |       |             |                      |   |             |        |                 |             |         |   |             |          |   |             |                    |    |              |             |    |              |                             |    |              |               |    |              |               |    |              |          |    |              |                              |   |             |              |
| 3  | Asia (besides China & South Korea)                                  |                                                                       |                                                                                                                                                                                                                                                                                                                                                                                                                                                                                                                                                                                                                                                                                                                                                                                                                                                                                                                                                                                                                            |   |             |                          |             |             |                                    |   |             |     |       |             |                      |   |             |        |                 |             |         |   |             |          |   |             |                    |    |              |             |    |              |                             |    |              |               |    |              |               |    |              |          |    |              |                              |   |             |              |
| 4  | Iran                                                                |                                                                       |                                                                                                                                                                                                                                                                                                                                                                                                                                                                                                                                                                                                                                                                                                                                                                                                                                                                                                                                                                                                                            |   |             |                          |             |             |                                    |   |             |     |       |             |                      |   |             |        |                 |             |         |   |             |          |   |             |                    |    |              |             |    |              |                             |    |              |               |    |              |               |    |              |          |    |              |                              |   |             |              |
| 5  | Italy                                                               |                                                                       |                                                                                                                                                                                                                                                                                                                                                                                                                                                                                                                                                                                                                                                                                                                                                                                                                                                                                                                                                                                                                            |   |             |                          |             |             |                                    |   |             |     |       |             |                      |   |             |        |                 |             |         |   |             |          |   |             |                    |    |              |             |    |              |                             |    |              |               |    |              |               |    |              |          |    |              |                              |   |             |              |
| 6  | Europe besides Italy                                                |                                                                       |                                                                                                                                                                                                                                                                                                                                                                                                                                                                                                                                                                                                                                                                                                                                                                                                                                                                                                                                                                                                                            |   |             |                          |             |             |                                    |   |             |     |       |             |                      |   |             |        |                 |             |         |   |             |          |   |             |                    |    |              |             |    |              |                             |    |              |               |    |              |               |    |              |          |    |              |                              |   |             |              |
| 7  | Other                                                               |                                                                       |                                                                                                                                                                                                                                                                                                                                                                                                                                                                                                                                                                                                                                                                                                                                                                                                                                                                                                                                                                                                                            |   |             |                          |             |             |                                    |   |             |     |       |             |                      |   |             |        |                 |             |         |   |             |          |   |             |                    |    |              |             |    |              |                             |    |              |               |    |              |               |    |              |          |    |              |                              |   |             |              |
| 8  | Domestic Travel                                                     |                                                                       |                                                                                                                                                                                                                                                                                                                                                                                                                                                                                                                                                                                                                                                                                                                                                                                                                                                                                                                                                                                                                            |   |             |                          |             |             |                                    |   |             |     |       |             |                      |   |             |        |                 |             |         |   |             |          |   |             |                    |    |              |             |    |              |                             |    |              |               |    |              |               |    |              |          |    |              |                              |   |             |              |
| 16 | othertravellocation<br>Show the field ONLY if: [travel_where] = '7' | If Other, please specify:                                             | text                                                                                                                                                                                                                                                                                                                                                                                                                                                                                                                                                                                                                                                                                                                                                                                                                                                                                                                                                                                                                       |   |             |                          |             |             |                                    |   |             |     |       |             |                      |   |             |        |                 |             |         |   |             |          |   |             |                    |    |              |             |    |              |                             |    |              |               |    |              |               |    |              |          |    |              |                              |   |             |              |
| 17 | sickcontacts                                                        | Sick Contacts?                                                        | yesno, Required<br><table border="1"> <tr><td>1</td><td>Yes</td></tr> <tr><td>0</td><td>No</td></tr> </table>                                                                                                                                                                                                                                                                                                                                                                                                                                                                                                                                                                                                                                                                                                                                                                                                                                                                                                              | 1 | Yes         | 0                        | No          |             |                                    |   |             |     |       |             |                      |   |             |        |                 |             |         |   |             |          |   |             |                    |    |              |             |    |              |                             |    |              |               |    |              |               |    |              |          |    |              |                              |   |             |              |
| 1  | Yes                                                                 |                                                                       |                                                                                                                                                                                                                                                                                                                                                                                                                                                                                                                                                                                                                                                                                                                                                                                                                                                                                                                                                                                                                            |   |             |                          |             |             |                                    |   |             |     |       |             |                      |   |             |        |                 |             |         |   |             |          |   |             |                    |    |              |             |    |              |                             |    |              |               |    |              |               |    |              |          |    |              |                              |   |             |              |
| 0  | No                                                                  |                                                                       |                                                                                                                                                                                                                                                                                                                                                                                                                                                                                                                                                                                                                                                                                                                                                                                                                                                                                                                                                                                                                            |   |             |                          |             |             |                                    |   |             |     |       |             |                      |   |             |        |                 |             |         |   |             |          |   |             |                    |    |              |             |    |              |                             |    |              |               |    |              |               |    |              |          |    |              |                              |   |             |              |
| 18 | exposure                                                            | Exposure to someone with confirmed COVID-19 infection?                | yesno, Required<br><table border="1"> <tr><td>1</td><td>Yes</td></tr> <tr><td>0</td><td>No</td></tr> </table>                                                                                                                                                                                                                                                                                                                                                                                                                                                                                                                                                                                                                                                                                                                                                                                                                                                                                                              | 1 | Yes         | 0                        | No          |             |                                    |   |             |     |       |             |                      |   |             |        |                 |             |         |   |             |          |   |             |                    |    |              |             |    |              |                             |    |              |               |    |              |               |    |              |          |    |              |                              |   |             |              |
| 1  | Yes                                                                 |                                                                       |                                                                                                                                                                                                                                                                                                                                                                                                                                                                                                                                                                                                                                                                                                                                                                                                                                                                                                                                                                                                                            |   |             |                          |             |             |                                    |   |             |     |       |             |                      |   |             |        |                 |             |         |   |             |          |   |             |                    |    |              |             |    |              |                             |    |              |               |    |              |               |    |              |          |    |              |                              |   |             |              |
| 0  | No                                                                  |                                                                       |                                                                                                                                                                                                                                                                                                                                                                                                                                                                                                                                                                                                                                                                                                                                                                                                                                                                                                                                                                                                                            |   |             |                          |             |             |                                    |   |             |     |       |             |                      |   |             |        |                 |             |         |   |             |          |   |             |                    |    |              |             |    |              |                             |    |              |               |    |              |               |    |              |          |    |              |                              |   |             |              |
| 19 | healthcare_worker                                                   | Does the patient work in a healthcare facility?                       | yesno, Required<br><table border="1"> <tr><td>1</td><td>Yes</td></tr> <tr><td>0</td><td>No</td></tr> </table>                                                                                                                                                                                                                                                                                                                                                                                                                                                                                                                                                                                                                                                                                                                                                                                                                                                                                                              | 1 | Yes         | 0                        | No          |             |                                    |   |             |     |       |             |                      |   |             |        |                 |             |         |   |             |          |   |             |                    |    |              |             |    |              |                             |    |              |               |    |              |               |    |              |          |    |              |                              |   |             |              |
| 1  | Yes                                                                 |                                                                       |                                                                                                                                                                                                                                                                                                                                                                                                                                                                                                                                                                                                                                                                                                                                                                                                                                                                                                                                                                                                                            |   |             |                          |             |             |                                    |   |             |     |       |             |                      |   |             |        |                 |             |         |   |             |          |   |             |                    |    |              |             |    |              |                             |    |              |               |    |              |               |    |              |          |    |              |                              |   |             |              |
| 0  | No                                                                  |                                                                       |                                                                                                                                                                                                                                                                                                                                                                                                                                                                                                                                                                                                                                                                                                                                                                                                                                                                                                                                                                                                                            |   |             |                          |             |             |                                    |   |             |     |       |             |                      |   |             |        |                 |             |         |   |             |          |   |             |                    |    |              |             |    |              |                             |    |              |               |    |              |               |    |              |          |    |              |                              |   |             |              |
| 20 | symptoms_at_presentation_c<br>complete                              | Section Header: <i>Form Status</i><br>Complete?                       | dropdown<br><table border="1"> <tr><td>0</td><td>Incomplete</td></tr> <tr><td>1</td><td>Unverified</td></tr> <tr><td>2</td><td>Complete</td></tr> </table>                                                                                                                                                                                                                                                                                                                                                                                                                                                                                                                                                                                                                                                                                                                                                                                                                                                                 | 0 | Incomplete  | 1                        | Unverified  | 2           | Complete                           |   |             |     |       |             |                      |   |             |        |                 |             |         |   |             |          |   |             |                    |    |              |             |    |              |                             |    |              |               |    |              |               |    |              |          |    |              |                              |   |             |              |
| 0  | Incomplete                                                          |                                                                       |                                                                                                                                                                                                                                                                                                                                                                                                                                                                                                                                                                                                                                                                                                                                                                                                                                                                                                                                                                                                                            |   |             |                          |             |             |                                    |   |             |     |       |             |                      |   |             |        |                 |             |         |   |             |          |   |             |                    |    |              |             |    |              |                             |    |              |               |    |              |               |    |              |          |    |              |                              |   |             |              |
| 1  | Unverified                                                          |                                                                       |                                                                                                                                                                                                                                                                                                                                                                                                                                                                                                                                                                                                                                                                                                                                                                                                                                                                                                                                                                                                                            |   |             |                          |             |             |                                    |   |             |     |       |             |                      |   |             |        |                 |             |         |   |             |          |   |             |                    |    |              |             |    |              |                             |    |              |               |    |              |               |    |              |          |    |              |                              |   |             |              |
| 2  | Complete                                                            |                                                                       |                                                                                                                                                                                                                                                                                                                                                                                                                                                                                                                                                                                                                                                                                                                                                                                                                                                                                                                                                                                                                            |   |             |                          |             |             |                                    |   |             |     |       |             |                      |   |             |        |                 |             |         |   |             |          |   |             |                    |    |              |             |    |              |                             |    |              |               |    |              |               |    |              |          |    |              |                              |   |             |              |

|    |                                                                    |                                    |                                                                                                                                                                                                                  |   |                |   |               |   |              |   |         |
|----|--------------------------------------------------------------------|------------------------------------|------------------------------------------------------------------------------------------------------------------------------------------------------------------------------------------------------------------|---|----------------|---|---------------|---|--------------|---|---------|
| 21 | smoking_history                                                    | Smoking History                    | radio, Required<br><table border="1"> <tr><td>1</td><td>Current Smoker</td></tr> <tr><td>2</td><td>Former Smoker</td></tr> <tr><td>3</td><td>Never Smoker</td></tr> <tr><td>4</td><td>Unknown</td></tr> </table> | 1 | Current Smoker | 2 | Former Smoker | 3 | Never Smoker | 4 | Unknown |
| 1  | Current Smoker                                                     |                                    |                                                                                                                                                                                                                  |   |                |   |               |   |              |   |         |
| 2  | Former Smoker                                                      |                                    |                                                                                                                                                                                                                  |   |                |   |               |   |              |   |         |
| 3  | Never Smoker                                                       |                                    |                                                                                                                                                                                                                  |   |                |   |               |   |              |   |         |
| 4  | Unknown                                                            |                                    |                                                                                                                                                                                                                  |   |                |   |               |   |              |   |         |
| 22 | vaping_history                                                     | Vaping History?                    | radio, Required<br><table border="1"> <tr><td>1</td><td>Current</td></tr> <tr><td>2</td><td>Former</td></tr> <tr><td>3</td><td>Never</td></tr> <tr><td>4</td><td>Unknown</td></tr> </table>                      | 1 | Current        | 2 | Former        | 3 | Never        | 4 | Unknown |
| 1  | Current                                                            |                                    |                                                                                                                                                                                                                  |   |                |   |               |   |              |   |         |
| 2  | Former                                                             |                                    |                                                                                                                                                                                                                  |   |                |   |               |   |              |   |         |
| 3  | Never                                                              |                                    |                                                                                                                                                                                                                  |   |                |   |               |   |              |   |         |
| 4  | Unknown                                                            |                                    |                                                                                                                                                                                                                  |   |                |   |               |   |              |   |         |
| 23 | pregnancy                                                          | Is the patient pregnant?           | yesno, Required<br><table border="1"> <tr><td>1</td><td>Yes</td></tr> <tr><td>0</td><td>No</td></tr> </table>                                                                                                    | 1 | Yes            | 0 | No            |   |              |   |         |
| 1  | Yes                                                                |                                    |                                                                                                                                                                                                                  |   |                |   |               |   |              |   |         |
| 0  | No                                                                 |                                    |                                                                                                                                                                                                                  |   |                |   |               |   |              |   |         |
| 24 | hypertensionhx                                                     | History of Hypertension?           | yesno, Required<br><table border="1"> <tr><td>1</td><td>Yes</td></tr> <tr><td>0</td><td>No</td></tr> </table>                                                                                                    | 1 | Yes            | 0 | No            |   |              |   |         |
| 1  | Yes                                                                |                                    |                                                                                                                                                                                                                  |   |                |   |               |   |              |   |         |
| 0  | No                                                                 |                                    |                                                                                                                                                                                                                  |   |                |   |               |   |              |   |         |
| 25 | diabeteshx                                                         | History of Diabetes?               | yesno, Required<br><table border="1"> <tr><td>1</td><td>Yes</td></tr> <tr><td>0</td><td>No</td></tr> </table>                                                                                                    | 1 | Yes            | 0 | No            |   |              |   |         |
| 1  | Yes                                                                |                                    |                                                                                                                                                                                                                  |   |                |   |               |   |              |   |         |
| 0  | No                                                                 |                                    |                                                                                                                                                                                                                  |   |                |   |               |   |              |   |         |
| 26 | asthmahx                                                           | History of Asthma?                 | yesno, Required<br><table border="1"> <tr><td>1</td><td>Yes</td></tr> <tr><td>0</td><td>No</td></tr> </table>                                                                                                    | 1 | Yes            | 0 | No            |   |              |   |         |
| 1  | Yes                                                                |                                    |                                                                                                                                                                                                                  |   |                |   |               |   |              |   |         |
| 0  | No                                                                 |                                    |                                                                                                                                                                                                                  |   |                |   |               |   |              |   |         |
| 27 | coronaryheartdiseasehx                                             | History of coronary heart disease? | yesno, Required<br><table border="1"> <tr><td>1</td><td>Yes</td></tr> <tr><td>0</td><td>No</td></tr> </table>                                                                                                    | 1 | Yes            | 0 | No            |   |              |   |         |
| 1  | Yes                                                                |                                    |                                                                                                                                                                                                                  |   |                |   |               |   |              |   |         |
| 0  | No                                                                 |                                    |                                                                                                                                                                                                                  |   |                |   |               |   |              |   |         |
| 28 | copdhx                                                             | History of COPD?                   | yesno, Required<br><table border="1"> <tr><td>1</td><td>Yes</td></tr> <tr><td>0</td><td>No</td></tr> </table>                                                                                                    | 1 | Yes            | 0 | No            |   |              |   |         |
| 1  | Yes                                                                |                                    |                                                                                                                                                                                                                  |   |                |   |               |   |              |   |         |
| 0  | No                                                                 |                                    |                                                                                                                                                                                                                  |   |                |   |               |   |              |   |         |
| 29 | heartfailurehx                                                     | History of Heart Failure?          | yesno, Required<br><table border="1"> <tr><td>1</td><td>Yes</td></tr> <tr><td>0</td><td>No</td></tr> </table>                                                                                                    | 1 | Yes            | 0 | No            |   |              |   |         |
| 1  | Yes                                                                |                                    |                                                                                                                                                                                                                  |   |                |   |               |   |              |   |         |
| 0  | No                                                                 |                                    |                                                                                                                                                                                                                  |   |                |   |               |   |              |   |         |
| 30 | carcinomahx                                                        | History of carcinoma?              | yesno, Required<br><table border="1"> <tr><td>1</td><td>Yes</td></tr> <tr><td>0</td><td>No</td></tr> </table>                                                                                                    | 1 | Yes            | 0 | No            |   |              |   |         |
| 1  | Yes                                                                |                                    |                                                                                                                                                                                                                  |   |                |   |               |   |              |   |         |
| 0  | No                                                                 |                                    |                                                                                                                                                                                                                  |   |                |   |               |   |              |   |         |
| 31 | immunosuppressionhx                                                | History of Immunosuppression?      | yesno, Required<br><table border="1"> <tr><td>1</td><td>Yes</td></tr> <tr><td>0</td><td>No</td></tr> </table>                                                                                                    | 1 | Yes            | 0 | No            |   |              |   |         |
| 1  | Yes                                                                |                                    |                                                                                                                                                                                                                  |   |                |   |               |   |              |   |         |
| 0  | No                                                                 |                                    |                                                                                                                                                                                                                  |   |                |   |               |   |              |   |         |
| 32 | ckdhx                                                              | History of Chronic Kidney Disease? | yesno, Required<br><table border="1"> <tr><td>1</td><td>Yes</td></tr> <tr><td>0</td><td>No</td></tr> </table>                                                                                                    | 1 | Yes            | 0 | No            |   |              |   |         |
| 1  | Yes                                                                |                                    |                                                                                                                                                                                                                  |   |                |   |               |   |              |   |         |
| 0  | No                                                                 |                                    |                                                                                                                                                                                                                  |   |                |   |               |   |              |   |         |
| 33 | medhxother                                                         | Other significant medical history? | yesno, Required<br><table border="1"> <tr><td>1</td><td>Yes</td></tr> <tr><td>0</td><td>No</td></tr> </table>                                                                                                    | 1 | Yes            | 0 | No            |   |              |   |         |
| 1  | Yes                                                                |                                    |                                                                                                                                                                                                                  |   |                |   |               |   |              |   |         |
| 0  | No                                                                 |                                    |                                                                                                                                                                                                                  |   |                |   |               |   |              |   |         |
| 34 | othermedhxspecify<br>Show the field ONLY if:<br>[medhxother] = '1' | Please specify:                    | text, Required                                                                                                                                                                                                   |   |                |   |               |   |              |   |         |

|    |                          |                                                 |                                                                                                                                                            |   |            |   |            |   |          |
|----|--------------------------|-------------------------------------------------|------------------------------------------------------------------------------------------------------------------------------------------------------------|---|------------|---|------------|---|----------|
| 35 | medical_history_complete | Section Header: <i>Form Status</i><br>Complete? | dropdown<br><table border="1"> <tr><td>0</td><td>Incomplete</td></tr> <tr><td>1</td><td>Unverified</td></tr> <tr><td>2</td><td>Complete</td></tr> </table> | 0 | Incomplete | 1 | Unverified | 2 | Complete |
| 0  | Incomplete               |                                                 |                                                                                                                                                            |   |            |   |            |   |          |
| 1  | Unverified               |                                                 |                                                                                                                                                            |   |            |   |            |   |          |
| 2  | Complete                 |                                                 |                                                                                                                                                            |   |            |   |            |   |          |

Instrument: **Lab Results At Presentation** (lab\_results\_at\_presentation)

[^ Collapse](#)

|    |                  |                                        |                                                                                                                                                                                                                                     |   |                 |                                        |    |                  |                          |
|----|------------------|----------------------------------------|-------------------------------------------------------------------------------------------------------------------------------------------------------------------------------------------------------------------------------------|---|-----------------|----------------------------------------|----|------------------|--------------------------|
| 36 | labs_ordered     | Was COVID testing ordered?             | checkbox, Required<br><table border="1"> <tr> <td>4</td> <td>labs_ordered__4</td> <td>Yes (Coronavirus (SARS-Cov-2 by PCR) )</td> </tr> <tr> <td>15</td> <td>labs_ordered__15</td> <td>No COVID testing ordered</td> </tr> </table> | 4 | labs_ordered__4 | Yes (Coronavirus (SARS-Cov-2 by PCR) ) | 15 | labs_ordered__15 | No COVID testing ordered |
| 4  | labs_ordered__4  | Yes (Coronavirus (SARS-Cov-2 by PCR) ) |                                                                                                                                                                                                                                     |   |                 |                                        |    |                  |                          |
| 15 | labs_ordered__15 | No COVID testing ordered               |                                                                                                                                                                                                                                     |   |                 |                                        |    |                  |                          |

|    |                                                                    |                      |                                                                                                                                                                 |   |          |   |          |   |                      |
|----|--------------------------------------------------------------------|----------------------|-----------------------------------------------------------------------------------------------------------------------------------------------------------------|---|----------|---|----------|---|----------------------|
| 37 | covid_19_result<br>Show the field ONLY if: [labs_ordered(4)] = '1' | COVID-19 Test Result | radio<br><table border="1"> <tr><td>1</td><td>Positive</td></tr> <tr><td>2</td><td>Negative</td></tr> <tr><td>3</td><td>Indeterminate result</td></tr> </table> | 1 | Positive | 2 | Negative | 3 | Indeterminate result |
| 1  | Positive                                                           |                      |                                                                                                                                                                 |   |          |   |          |   |                      |
| 2  | Negative                                                           |                      |                                                                                                                                                                 |   |          |   |          |   |                      |
| 3  | Indeterminate result                                               |                      |                                                                                                                                                                 |   |          |   |          |   |                      |

|    |                                      |                                                 |                                                                                                                                                            |   |            |   |            |   |          |
|----|--------------------------------------|-------------------------------------------------|------------------------------------------------------------------------------------------------------------------------------------------------------------|---|------------|---|------------|---|----------|
| 38 | lab_results_at_presentation_complete | Section Header: <i>Form Status</i><br>Complete? | dropdown<br><table border="1"> <tr><td>0</td><td>Incomplete</td></tr> <tr><td>1</td><td>Unverified</td></tr> <tr><td>2</td><td>Complete</td></tr> </table> | 0 | Incomplete | 1 | Unverified | 2 | Complete |
| 0  | Incomplete                           |                                                 |                                                                                                                                                            |   |            |   |            |   |          |
| 1  | Unverified                           |                                                 |                                                                                                                                                            |   |            |   |            |   |          |
| 2  | Complete                             |                                                 |                                                                                                                                                            |   |            |   |            |   |          |

Instrument: **Imaging Results At Presentation** (imaging\_results\_at\_presentation)

[^ Collapse](#)

|    |                    |                    |                                                                                                                                                                                                                                                                                  |   |                    |                   |   |                    |          |   |                    |                    |
|----|--------------------|--------------------|----------------------------------------------------------------------------------------------------------------------------------------------------------------------------------------------------------------------------------------------------------------------------------|---|--------------------|-------------------|---|--------------------|----------|---|--------------------|--------------------|
| 39 | imaging_ordered    | Imaging Ordered    | checkbox, Required<br><table border="1"> <tr> <td>1</td> <td>imaging_ordered__1</td> <td>Chest AP Portable</td> </tr> <tr> <td>2</td> <td>imaging_ordered__2</td> <td>CT Chest</td> </tr> <tr> <td>3</td> <td>imaging_ordered__3</td> <td>No Imaging Ordered</td> </tr> </table> | 1 | imaging_ordered__1 | Chest AP Portable | 2 | imaging_ordered__2 | CT Chest | 3 | imaging_ordered__3 | No Imaging Ordered |
| 1  | imaging_ordered__1 | Chest AP Portable  |                                                                                                                                                                                                                                                                                  |   |                    |                   |   |                    |          |   |                    |                    |
| 2  | imaging_ordered__2 | CT Chest           |                                                                                                                                                                                                                                                                                  |   |                    |                   |   |                    |          |   |                    |                    |
| 3  | imaging_ordered__3 | No Imaging Ordered |                                                                                                                                                                                                                                                                                  |   |                    |                   |   |                    |          |   |                    |                    |

|    |                                                                         |                                                        |                                                                                                                |   |          |   |          |
|----|-------------------------------------------------------------------------|--------------------------------------------------------|----------------------------------------------------------------------------------------------------------------|---|----------|---|----------|
| 40 | chest_xray_result<br>Show the field ONLY if: [imaging_ordered(1)] = '1' | Chest X-Ray Result (only consider infectious findings) | radio<br><table border="1"> <tr><td>1</td><td>Positive</td></tr> <tr><td>2</td><td>Negative</td></tr> </table> | 1 | Positive | 2 | Negative |
| 1  | Positive                                                                |                                                        |                                                                                                                |   |          |   |          |
| 2  | Negative                                                                |                                                        |                                                                                                                |   |          |   |          |

|    |                                                                        |                                                 |                                                                                                                   |   |            |   |           |
|----|------------------------------------------------------------------------|-------------------------------------------------|-------------------------------------------------------------------------------------------------------------------|---|------------|---|-----------|
| 41 | findings_chest_ap<br>Show the field ONLY if: [chest_xray_result] = '1' | Were positive findings unilateral or bilateral? | radio<br><table border="1"> <tr><td>1</td><td>Unilateral</td></tr> <tr><td>2</td><td>Bilateral</td></tr> </table> | 1 | Unilateral | 2 | Bilateral |
| 1  | Unilateral                                                             |                                                 |                                                                                                                   |   |            |   |           |
| 2  | Bilateral                                                              |                                                 |                                                                                                                   |   |            |   |           |

|    |                                                                       |                                                     |                                                                                                                |   |          |   |          |
|----|-----------------------------------------------------------------------|-----------------------------------------------------|----------------------------------------------------------------------------------------------------------------|---|----------|---|----------|
| 42 | ct_chest_result<br>Show the field ONLY if: [imaging_ordered(2)] = '1' | CT Chest Result (only consider infectious findings) | radio<br><table border="1"> <tr><td>1</td><td>Positive</td></tr> <tr><td>2</td><td>Negative</td></tr> </table> | 1 | Positive | 2 | Negative |
| 1  | Positive                                                              |                                                     |                                                                                                                |   |          |   |          |
| 2  | Negative                                                              |                                                     |                                                                                                                |   |          |   |          |

|    |                                                                      |                                                 |                                                                                                                   |   |            |   |           |
|----|----------------------------------------------------------------------|-------------------------------------------------|-------------------------------------------------------------------------------------------------------------------|---|------------|---|-----------|
| 43 | findings_ct_chest<br>Show the field ONLY if: [ct_chest_result] = '1' | Were positive findings unilateral or bilateral? | radio<br><table border="1"> <tr><td>1</td><td>Unilateral</td></tr> <tr><td>2</td><td>Bilateral</td></tr> </table> | 1 | Unilateral | 2 | Bilateral |
| 1  | Unilateral                                                           |                                                 |                                                                                                                   |   |            |   |           |
| 2  | Bilateral                                                            |                                                 |                                                                                                                   |   |            |   |           |

|    |                                          |                                                 |                                                                                                                                                            |   |            |   |            |   |          |
|----|------------------------------------------|-------------------------------------------------|------------------------------------------------------------------------------------------------------------------------------------------------------------|---|------------|---|------------|---|----------|
| 44 | imaging_results_at_presentation_complete | Section Header: <i>Form Status</i><br>Complete? | dropdown<br><table border="1"> <tr><td>0</td><td>Incomplete</td></tr> <tr><td>1</td><td>Unverified</td></tr> <tr><td>2</td><td>Complete</td></tr> </table> | 0 | Incomplete | 1 | Unverified | 2 | Complete |
| 0  | Incomplete                               |                                                 |                                                                                                                                                            |   |            |   |            |   |          |
| 1  | Unverified                               |                                                 |                                                                                                                                                            |   |            |   |            |   |          |
| 2  | Complete                                 |                                                 |                                                                                                                                                            |   |            |   |            |   |          |

Instrument: **Treatments** (treatments)

[^ Collapse](#)

|    |        |                 |                                                                                                     |   |     |   |    |
|----|--------|-----------------|-----------------------------------------------------------------------------------------------------|---|-----|---|----|
| 45 | oxygen | Oxygen Therapy? | yesno<br><table border="1"> <tr><td>1</td><td>Yes</td></tr> <tr><td>0</td><td>No</td></tr> </table> | 1 | Yes | 0 | No |
| 1  | Yes    |                 |                                                                                                     |   |     |   |    |
| 0  | No     |                 |                                                                                                     |   |     |   |    |

|    |                                                                               |                                                                         |                                                                                                                                                                                                                                                                                                                                                                                                   |   |               |               |    |               |               |   |               |           |   |               |                |   |               |              |
|----|-------------------------------------------------------------------------------|-------------------------------------------------------------------------|---------------------------------------------------------------------------------------------------------------------------------------------------------------------------------------------------------------------------------------------------------------------------------------------------------------------------------------------------------------------------------------------------|---|---------------|---------------|----|---------------|---------------|---|---------------|-----------|---|---------------|----------------|---|---------------|--------------|
| 46 | oxygentype<br>Show the field ONLY if:<br>[oxygen] = '1'                       | Specify what type of oxygen therapy was provided (check all that apply) | checkbox, Required<br><table border="1"> <tr> <td>1</td> <td>oxygentype__1</td> <td>nasal cannula</td> </tr> <tr> <td>2</td> <td>oxygentype__2</td> <td>nonrebreather</td> </tr> <tr> <td>3</td> <td>oxygentype__3</td> <td>ventimask</td> </tr> <tr> <td>4</td> <td>oxygentype__4</td> <td>blow-by oxygen</td> </tr> <tr> <td>5</td> <td>oxygentype__5</td> <td>trach collar</td> </tr> </table> | 1 | oxygentype__1 | nasal cannula | 2  | oxygentype__2 | nonrebreather | 3 | oxygentype__3 | ventimask | 4 | oxygentype__4 | blow-by oxygen | 5 | oxygentype__5 | trach collar |
| 1  | oxygentype__1                                                                 | nasal cannula                                                           |                                                                                                                                                                                                                                                                                                                                                                                                   |   |               |               |    |               |               |   |               |           |   |               |                |   |               |              |
| 2  | oxygentype__2                                                                 | nonrebreather                                                           |                                                                                                                                                                                                                                                                                                                                                                                                   |   |               |               |    |               |               |   |               |           |   |               |                |   |               |              |
| 3  | oxygentype__3                                                                 | ventimask                                                               |                                                                                                                                                                                                                                                                                                                                                                                                   |   |               |               |    |               |               |   |               |           |   |               |                |   |               |              |
| 4  | oxygentype__4                                                                 | blow-by oxygen                                                          |                                                                                                                                                                                                                                                                                                                                                                                                   |   |               |               |    |               |               |   |               |           |   |               |                |   |               |              |
| 5  | oxygentype__5                                                                 | trach collar                                                            |                                                                                                                                                                                                                                                                                                                                                                                                   |   |               |               |    |               |               |   |               |           |   |               |                |   |               |              |
| 47 | invmech_ventilation                                                           | Did the patient require invasive mechanical ventilation?                | yesno, Required<br><table border="1"> <tr> <td>1</td> <td>Yes</td> </tr> <tr> <td>0</td> <td>No</td> </tr> </table>                                                                                                                                                                                                                                                                               | 1 | Yes           | 0             | No |               |               |   |               |           |   |               |                |   |               |              |
| 1  | Yes                                                                           |                                                                         |                                                                                                                                                                                                                                                                                                                                                                                                   |   |               |               |    |               |               |   |               |           |   |               |                |   |               |              |
| 0  | No                                                                            |                                                                         |                                                                                                                                                                                                                                                                                                                                                                                                   |   |               |               |    |               |               |   |               |           |   |               |                |   |               |              |
| 48 | ems_intubation<br>Show the field ONLY if:<br>[invmech_ventilation] = '1'      | Was the patient intubated in the field by EMS?                          | yesno, Required<br><table border="1"> <tr> <td>1</td> <td>Yes</td> </tr> <tr> <td>0</td> <td>No</td> </tr> </table>                                                                                                                                                                                                                                                                               | 1 | Yes           | 0             | No |               |               |   |               |           |   |               |                |   |               |              |
| 1  | Yes                                                                           |                                                                         |                                                                                                                                                                                                                                                                                                                                                                                                   |   |               |               |    |               |               |   |               |           |   |               |                |   |               |              |
| 0  | No                                                                            |                                                                         |                                                                                                                                                                                                                                                                                                                                                                                                   |   |               |               |    |               |               |   |               |           |   |               |                |   |               |              |
| 49 | ed_intubation<br>Show the field ONLY if:<br>[invmech_ventilation] = '1'       | Was the patient intubated in the ED?                                    | yesno, Required<br><table border="1"> <tr> <td>1</td> <td>Yes</td> </tr> <tr> <td>0</td> <td>No</td> </tr> </table>                                                                                                                                                                                                                                                                               | 1 | Yes           | 0             | No |               |               |   |               |           |   |               |                |   |               |              |
| 1  | Yes                                                                           |                                                                         |                                                                                                                                                                                                                                                                                                                                                                                                   |   |               |               |    |               |               |   |               |           |   |               |                |   |               |              |
| 0  | No                                                                            |                                                                         |                                                                                                                                                                                                                                                                                                                                                                                                   |   |               |               |    |               |               |   |               |           |   |               |                |   |               |              |
| 50 | start_invmech_vent<br>Show the field ONLY if:<br>[invmech_ventilation] = '1'  | Start time of invasive mechanical ventilation                           | text (datetime_mdy), Required                                                                                                                                                                                                                                                                                                                                                                     |   |               |               |    |               |               |   |               |           |   |               |                |   |               |              |
| 51 | stop_invmech_vent<br>Show the field ONLY if:<br>[invmech_ventilation] = '1'   | Stop Time of Invasive Mechanical Ventilation                            | text (datetime_mdy), Required                                                                                                                                                                                                                                                                                                                                                                     |   |               |               |    |               |               |   |               |           |   |               |                |   |               |              |
| 52 | invmech_vent_time<br>Show the field ONLY if:<br>[invmech_ventilation] = '1'   | Time of Invasive Mechanical Ventilation                                 | calc<br>Calculation: datediff([stop_invmech_vent], [start_invmech_vent], "d", "mdy")                                                                                                                                                                                                                                                                                                              |   |               |               |    |               |               |   |               |           |   |               |                |   |               |              |
| 53 | re_intubated<br>Show the field ONLY if:<br>[invmech_ventilation] = '1'        | Was the patient re-intubated during their hospital stay?                | yesno, Required<br><table border="1"> <tr> <td>1</td> <td>Yes</td> </tr> <tr> <td>0</td> <td>No</td> </tr> </table>                                                                                                                                                                                                                                                                               | 1 | Yes           | 0             | No |               |               |   |               |           |   |               |                |   |               |              |
| 1  | Yes                                                                           |                                                                         |                                                                                                                                                                                                                                                                                                                                                                                                   |   |               |               |    |               |               |   |               |           |   |               |                |   |               |              |
| 0  | No                                                                            |                                                                         |                                                                                                                                                                                                                                                                                                                                                                                                   |   |               |               |    |               |               |   |               |           |   |               |                |   |               |              |
| 54 | start_reintubation<br>Show the field ONLY if:<br>[re_intubated] = '1'         | Start time of re-intubation                                             | text (datetime_mdy), Required                                                                                                                                                                                                                                                                                                                                                                     |   |               |               |    |               |               |   |               |           |   |               |                |   |               |              |
| 55 | stop_reintubation<br>Show the field ONLY if:<br>[re_intubated] = '1'          | Stop Time of re-intubation                                              | text (datetime_mdy), Required                                                                                                                                                                                                                                                                                                                                                                     |   |               |               |    |               |               |   |               |           |   |               |                |   |               |              |
| 56 | time_reintubation<br>Show the field ONLY if:<br>[re_intubated] = '1'          | Time of Re-Intubation (days)                                            | calc, Required<br>Calculation: datediff([stop_reintubation], [start_reintubation], "d", "mdy")                                                                                                                                                                                                                                                                                                    |   |               |               |    |               |               |   |               |           |   |               |                |   |               |              |
| 57 | re_intubated_third<br>Show the field ONLY if:<br>[re_intubated] = '1'         | Was the patient re-intubated a third time during their hospital stay?   | yesno, Required<br><table border="1"> <tr> <td>1</td> <td>Yes</td> </tr> <tr> <td>0</td> <td>No</td> </tr> </table>                                                                                                                                                                                                                                                                               | 1 | Yes           | 0             | No |               |               |   |               |           |   |               |                |   |               |              |
| 1  | Yes                                                                           |                                                                         |                                                                                                                                                                                                                                                                                                                                                                                                   |   |               |               |    |               |               |   |               |           |   |               |                |   |               |              |
| 0  | No                                                                            |                                                                         |                                                                                                                                                                                                                                                                                                                                                                                                   |   |               |               |    |               |               |   |               |           |   |               |                |   |               |              |
| 58 | start_reintubation_2<br>Show the field ONLY if:<br>[re_intubated_third] = '1' | Start time of re-intubation                                             | text (datetime_mdy), Required                                                                                                                                                                                                                                                                                                                                                                     |   |               |               |    |               |               |   |               |           |   |               |                |   |               |              |
| 59 | stop_reintubation_2<br>Show the field ONLY if:<br>[re_intubated_third] = '1'  | Stop Time of re-intubation                                              | text (datetime_mdy), Required                                                                                                                                                                                                                                                                                                                                                                     |   |               |               |    |               |               |   |               |           |   |               |                |   |               |              |
| 60 | time_reintubation_2<br>Show the field ONLY if:<br>[re_intubated_third] = '1'  | Time of Re-Intubation (days)                                            | calc, Required<br>Calculation: datediff([stop_reintubation_2], [start_reintubation_2], "d", "mdy")                                                                                                                                                                                                                                                                                                |   |               |               |    |               |               |   |               |           |   |               |                |   |               |              |
| 61 | noninv_mech_ventilation                                                       | Did the patient require non-invasive mechanical ventilation?            | yesno, Required<br><table border="1"> <tr> <td>1</td> <td>Yes</td> </tr> <tr> <td>0</td> <td>No</td> </tr> </table>                                                                                                                                                                                                                                                                               | 1 | Yes           | 0             | No |               |               |   |               |           |   |               |                |   |               |              |
| 1  | Yes                                                                           |                                                                         |                                                                                                                                                                                                                                                                                                                                                                                                   |   |               |               |    |               |               |   |               |           |   |               |                |   |               |              |
| 0  | No                                                                            |                                                                         |                                                                                                                                                                                                                                                                                                                                                                                                   |   |               |               |    |               |               |   |               |           |   |               |                |   |               |              |

|    |                                                                                        |                                                                                                                                                                    |                                                                                                                                                                                                                                                           |
|----|----------------------------------------------------------------------------------------|--------------------------------------------------------------------------------------------------------------------------------------------------------------------|-----------------------------------------------------------------------------------------------------------------------------------------------------------------------------------------------------------------------------------------------------------|
| 62 | ed_noninv_mech_vent<br>Show the field ONLY if:<br>[noninv_mech_ventilation] = '1'      | Was non-invasive mechanical ventilation initiated in the ED?                                                                                                       | yesno, Required<br>1 Yes<br>0 No                                                                                                                                                                                                                          |
| 63 | noninv_mech_vent_type<br>Show the field ONLY if:<br>[noninv_mech_ventilation] = '1'    | What type of non-invasive mechanical ventilation did the patient receive? (check all that apply)                                                                   | checkbox, Required<br>1 noninv_mech_vent_type__1 CPAP<br>2 noninv_mech_vent_type__2 Bipap<br>3 noninv_mech_vent_type__3 High-flow nasal O2                                                                                                                |
| 64 | start_noninvmech_vent<br>Show the field ONLY if:<br>[noninv_mech_ventilation] = '1'    | Start Time of non-invasive mechanical ventilation                                                                                                                  | text (datetime_mdy), Required                                                                                                                                                                                                                             |
| 65 | stop_noninvmech_vent<br>Show the field ONLY if:<br>[noninv_mech_ventilation] = '1'     | Stop Time of non-invasive mechanical ventilation                                                                                                                   | text (datetime_mdy), Required                                                                                                                                                                                                                             |
| 66 | time_noninvmech_vent<br>Show the field ONLY if:<br>[noninv_mech_ventilation] = '1'     | Time of non-invasive mechanical ventilation (days)                                                                                                                 | calc, Required<br>Calculation: datediff([stop_noninvmech_vent], [start_noninvmech_vent], "d", "mdy")                                                                                                                                                      |
| 67 | tracheostomy                                                                           | Did the patient have a tracheostomy while they were hospitalized?                                                                                                  | yesno, Required<br>1 Yes<br>0 No                                                                                                                                                                                                                          |
| 68 | tracheostomy_date<br>Show the field ONLY if:<br>[tracheostomy] = '1'                   | Tracheostomy Date                                                                                                                                                  | text (date_mdy), Required                                                                                                                                                                                                                                 |
| 69 | anticoag_prior                                                                         | Section Header: <i>Anticoagulation- Complete this section at time of discharge</i><br>Was the patient taking an anticoagulant prior to this visit (as a home med)? | yesno, Required<br>1 Yes<br>0 No                                                                                                                                                                                                                          |
| 70 | anticoag_type_prior<br>Show the field ONLY if:<br>[anticoag_prior] = '1'               | What anticoagulant were they taking at home?                                                                                                                       | radio, Required<br>1 eliquis/apixaban<br>2 xarelto/rivaroxiban<br>3 dabigatran/pradaxa<br>4 warfarin/coumadin<br>5 enoxaparin/lovenox                                                                                                                     |
| 71 | anticoag_indication<br>Show the field ONLY if:<br>[anticoag_prior] = '1'               | Indication for anticoagulation at home                                                                                                                             | checkbox, Required<br>1 anticoag_indication__1 atrial fibrillation<br>2 anticoag_indication__2 PE<br>3 anticoag_indication__3 DVT<br>4 anticoag_indication__4 stroke<br>5 anticoag_indication__5 mechanical heart valve<br>6 anticoag_indication__6 other |
| 72 | anticoag_indication_other<br>Show the field ONLY if:<br>[anticoag_indication(6)] = '1' | If other, please specify                                                                                                                                           | text, Required                                                                                                                                                                                                                                            |
| 73 | anticoagulants                                                                         | Did the patient receive any medications for anticoagulation during their visit?                                                                                    | yesno, Required<br>1 Yes<br>0 No                                                                                                                                                                                                                          |

|    |                                                                                           |                                                                                                                                                                                                                                                                                                                                |                                                                                                                                                                                                                                                                                                                                                                                                                                                                                                                                                        |   |                          |              |            |                          |                               |   |                         |                        |   |                         |                            |   |                         |                   |   |                         |                    |
|----|-------------------------------------------------------------------------------------------|--------------------------------------------------------------------------------------------------------------------------------------------------------------------------------------------------------------------------------------------------------------------------------------------------------------------------------|--------------------------------------------------------------------------------------------------------------------------------------------------------------------------------------------------------------------------------------------------------------------------------------------------------------------------------------------------------------------------------------------------------------------------------------------------------------------------------------------------------------------------------------------------------|---|--------------------------|--------------|------------|--------------------------|-------------------------------|---|-------------------------|------------------------|---|-------------------------|----------------------------|---|-------------------------|-------------------|---|-------------------------|--------------------|
| 74 | anticoagulation_type<br>Show the field ONLY if:<br>[anticoagulants] = '1'                 | What type of anticoagulation did the patient receive?<br><br>Prophylactic- heparin subcutaneous, enoxaparin/lovenox at a dose of 40 mg bid<br><br>Therapeutic- any heparin drip, eliquis/apixiban, xarelto/rivaroxiban, dabigatran/pradaxa, warfarin/coumadin, enoxaparin/lovenox at a dose of 1 mg/kg bid or 1.5 mg/kg qdaily | checkbox, Required<br><table border="1"> <tr> <td>1</td> <td>anticoagulation_type__1</td> <td>prophylactic</td> </tr> <tr> <td>2</td> <td>anticoagulation_type__2</td> <td>therapeutic</td> </tr> </table>                                                                                                                                                                                                                                                                                                                                             | 1 | anticoagulation_type__1  | prophylactic | 2          | anticoagulation_type__2  | therapeutic                   |   |                         |                        |   |                         |                            |   |                         |                   |   |                         |                    |
| 1  | anticoagulation_type__1                                                                   | prophylactic                                                                                                                                                                                                                                                                                                                   |                                                                                                                                                                                                                                                                                                                                                                                                                                                                                                                                                        |   |                          |              |            |                          |                               |   |                         |                        |   |                         |                            |   |                         |                   |   |                         |                    |
| 2  | anticoagulation_type__2                                                                   | therapeutic                                                                                                                                                                                                                                                                                                                    |                                                                                                                                                                                                                                                                                                                                                                                                                                                                                                                                                        |   |                          |              |            |                          |                               |   |                         |                        |   |                         |                            |   |                         |                   |   |                         |                    |
| 75 | anticoag_prophylactic<br>Show the field ONLY if:<br>[anticoagulation_type(1)] = '1'       | What was given for prophylactic anticoagulation?                                                                                                                                                                                                                                                                               | checkbox, Required<br><table border="1"> <tr> <td>1</td> <td>anticoag_prophylactic__1</td> <td>heparin</td> </tr> <tr> <td>2</td> <td>anticoag_prophylactic__2</td> <td>enoxaparin/lovenox</td> </tr> </table>                                                                                                                                                                                                                                                                                                                                         | 1 | anticoag_prophylactic__1 | heparin      | 2          | anticoag_prophylactic__2 | enoxaparin/lovenox            |   |                         |                        |   |                         |                            |   |                         |                   |   |                         |                    |
| 1  | anticoag_prophylactic__1                                                                  | heparin                                                                                                                                                                                                                                                                                                                        |                                                                                                                                                                                                                                                                                                                                                                                                                                                                                                                                                        |   |                          |              |            |                          |                               |   |                         |                        |   |                         |                            |   |                         |                   |   |                         |                    |
| 2  | anticoag_prophylactic__2                                                                  | enoxaparin/lovenox                                                                                                                                                                                                                                                                                                             |                                                                                                                                                                                                                                                                                                                                                                                                                                                                                                                                                        |   |                          |              |            |                          |                               |   |                         |                        |   |                         |                            |   |                         |                   |   |                         |                    |
| 76 | anticoag_prophylactic_start<br>Show the field ONLY if:<br>[anticoagulation_type(1)] = '1' | Start date of prophylactic anticoagulation                                                                                                                                                                                                                                                                                     | text (date_mdy), Required                                                                                                                                                                                                                                                                                                                                                                                                                                                                                                                              |   |                          |              |            |                          |                               |   |                         |                        |   |                         |                            |   |                         |                   |   |                         |                    |
| 77 | anticoag_prophylactic_stop<br>Show the field ONLY if:<br>[anticoagulation_type(1)] = '1'  | Stop Date of prophylactic anticoagulation                                                                                                                                                                                                                                                                                      | text (date_mdy), Required                                                                                                                                                                                                                                                                                                                                                                                                                                                                                                                              |   |                          |              |            |                          |                               |   |                         |                        |   |                         |                            |   |                         |                   |   |                         |                    |
| 78 | anticoag_therapeutic<br>Show the field ONLY if:<br>[anticoagulation_type(2)] = '1'        | What was given for therapeutic anticoagulation?                                                                                                                                                                                                                                                                                | checkbox, Required<br><table border="1"> <tr> <td>1</td> <td>anticoag_therapeutic__1</td> <td>heparin</td> </tr> <tr> <td>2</td> <td>anticoag_therapeutic__2</td> <td>eliquis/apixaban</td> </tr> <tr> <td>3</td> <td>anticoag_therapeutic__3</td> <td>xarelto/rivaroxiban</td> </tr> <tr> <td>4</td> <td>anticoag_therapeutic__4</td> <td>dabigatran/pradaxa</td> </tr> <tr> <td>5</td> <td>anticoag_therapeutic__5</td> <td>warfarin/coumadin</td> </tr> <tr> <td>6</td> <td>anticoag_therapeutic__6</td> <td>enoxaparin/lovenox</td> </tr> </table> | 1 | anticoag_therapeutic__1  | heparin      | 2          | anticoag_therapeutic__2  | eliquis/apixaban              | 3 | anticoag_therapeutic__3 | xarelto/rivaroxiban    | 4 | anticoag_therapeutic__4 | dabigatran/pradaxa         | 5 | anticoag_therapeutic__5 | warfarin/coumadin | 6 | anticoag_therapeutic__6 | enoxaparin/lovenox |
| 1  | anticoag_therapeutic__1                                                                   | heparin                                                                                                                                                                                                                                                                                                                        |                                                                                                                                                                                                                                                                                                                                                                                                                                                                                                                                                        |   |                          |              |            |                          |                               |   |                         |                        |   |                         |                            |   |                         |                   |   |                         |                    |
| 2  | anticoag_therapeutic__2                                                                   | eliquis/apixaban                                                                                                                                                                                                                                                                                                               |                                                                                                                                                                                                                                                                                                                                                                                                                                                                                                                                                        |   |                          |              |            |                          |                               |   |                         |                        |   |                         |                            |   |                         |                   |   |                         |                    |
| 3  | anticoag_therapeutic__3                                                                   | xarelto/rivaroxiban                                                                                                                                                                                                                                                                                                            |                                                                                                                                                                                                                                                                                                                                                                                                                                                                                                                                                        |   |                          |              |            |                          |                               |   |                         |                        |   |                         |                            |   |                         |                   |   |                         |                    |
| 4  | anticoag_therapeutic__4                                                                   | dabigatran/pradaxa                                                                                                                                                                                                                                                                                                             |                                                                                                                                                                                                                                                                                                                                                                                                                                                                                                                                                        |   |                          |              |            |                          |                               |   |                         |                        |   |                         |                            |   |                         |                   |   |                         |                    |
| 5  | anticoag_therapeutic__5                                                                   | warfarin/coumadin                                                                                                                                                                                                                                                                                                              |                                                                                                                                                                                                                                                                                                                                                                                                                                                                                                                                                        |   |                          |              |            |                          |                               |   |                         |                        |   |                         |                            |   |                         |                   |   |                         |                    |
| 6  | anticoag_therapeutic__6                                                                   | enoxaparin/lovenox                                                                                                                                                                                                                                                                                                             |                                                                                                                                                                                                                                                                                                                                                                                                                                                                                                                                                        |   |                          |              |            |                          |                               |   |                         |                        |   |                         |                            |   |                         |                   |   |                         |                    |
| 79 | anticoag_thera_start<br>Show the field ONLY if:<br>[anticoagulation_type(2)] = '1'        | Start Date of Therapeutic Anticoagulation                                                                                                                                                                                                                                                                                      | text (date_mdy), Required                                                                                                                                                                                                                                                                                                                                                                                                                                                                                                                              |   |                          |              |            |                          |                               |   |                         |                        |   |                         |                            |   |                         |                   |   |                         |                    |
| 80 | anticoag_thera_stop<br>Show the field ONLY if:<br>[anticoagulation_type(2)] = '1'         | Stop Date of Therapeutic Anticoagulation                                                                                                                                                                                                                                                                                       | text (date_mdy), Required                                                                                                                                                                                                                                                                                                                                                                                                                                                                                                                              |   |                          |              |            |                          |                               |   |                         |                        |   |                         |                            |   |                         |                   |   |                         |                    |
| 81 | steroids                                                                                  | Section Header: <i>Steroids- complete at time of discharge</i><br>Was the patient given steroids during this visit?                                                                                                                                                                                                            | yesno, Required<br><table border="1"> <tr> <td>1</td> <td>Yes</td> </tr> <tr> <td>0</td> <td>No</td> </tr> </table>                                                                                                                                                                                                                                                                                                                                                                                                                                    | 1 | Yes                      | 0            | No         |                          |                               |   |                         |                        |   |                         |                            |   |                         |                   |   |                         |                    |
| 1  | Yes                                                                                       |                                                                                                                                                                                                                                                                                                                                |                                                                                                                                                                                                                                                                                                                                                                                                                                                                                                                                                        |   |                          |              |            |                          |                               |   |                         |                        |   |                         |                            |   |                         |                   |   |                         |                    |
| 0  | No                                                                                        |                                                                                                                                                                                                                                                                                                                                |                                                                                                                                                                                                                                                                                                                                                                                                                                                                                                                                                        |   |                          |              |            |                          |                               |   |                         |                        |   |                         |                            |   |                         |                   |   |                         |                    |
| 82 | steroid_type<br>Show the field ONLY if:<br>[steroids] = '1'                               | What steroid was the patient given?                                                                                                                                                                                                                                                                                            | checkbox, Required<br><table border="1"> <tr> <td>1</td> <td>steroid_type__1</td> <td>prednisone</td> </tr> <tr> <td>2</td> <td>steroid_type__2</td> <td>methylprednisolone/solumedrol</td> </tr> <tr> <td>3</td> <td>steroid_type__3</td> <td>dexamethasone/decadron</td> </tr> <tr> <td>4</td> <td>steroid_type__4</td> <td>hydrocortisone/soul-cortef</td> </tr> </table>                                                                                                                                                                           | 1 | steroid_type__1          | prednisone   | 2          | steroid_type__2          | methylprednisolone/solumedrol | 3 | steroid_type__3         | dexamethasone/decadron | 4 | steroid_type__4         | hydrocortisone/soul-cortef |   |                         |                   |   |                         |                    |
| 1  | steroid_type__1                                                                           | prednisone                                                                                                                                                                                                                                                                                                                     |                                                                                                                                                                                                                                                                                                                                                                                                                                                                                                                                                        |   |                          |              |            |                          |                               |   |                         |                        |   |                         |                            |   |                         |                   |   |                         |                    |
| 2  | steroid_type__2                                                                           | methylprednisolone/solumedrol                                                                                                                                                                                                                                                                                                  |                                                                                                                                                                                                                                                                                                                                                                                                                                                                                                                                                        |   |                          |              |            |                          |                               |   |                         |                        |   |                         |                            |   |                         |                   |   |                         |                    |
| 3  | steroid_type__3                                                                           | dexamethasone/decadron                                                                                                                                                                                                                                                                                                         |                                                                                                                                                                                                                                                                                                                                                                                                                                                                                                                                                        |   |                          |              |            |                          |                               |   |                         |                        |   |                         |                            |   |                         |                   |   |                         |                    |
| 4  | steroid_type__4                                                                           | hydrocortisone/soul-cortef                                                                                                                                                                                                                                                                                                     |                                                                                                                                                                                                                                                                                                                                                                                                                                                                                                                                                        |   |                          |              |            |                          |                               |   |                         |                        |   |                         |                            |   |                         |                   |   |                         |                    |
| 83 | start_steroids<br>Show the field ONLY if:<br>[steroids] = '1'                             | Start Date of Steroids                                                                                                                                                                                                                                                                                                         | text (date_mdy), Required                                                                                                                                                                                                                                                                                                                                                                                                                                                                                                                              |   |                          |              |            |                          |                               |   |                         |                        |   |                         |                            |   |                         |                   |   |                         |                    |
| 84 | stop_steroids<br>Show the field ONLY if:<br>[steroids] = '1'                              | Stop Date of Steroids                                                                                                                                                                                                                                                                                                          | text (date_mdy), Required                                                                                                                                                                                                                                                                                                                                                                                                                                                                                                                              |   |                          |              |            |                          |                               |   |                         |                        |   |                         |                            |   |                         |                   |   |                         |                    |
| 85 | treatments_complete                                                                       | Section Header: <i>Form Status</i><br>Complete?                                                                                                                                                                                                                                                                                | dropdown<br><table border="1"> <tr> <td>0</td> <td>Incomplete</td> </tr> <tr> <td>1</td> <td>Unverified</td> </tr> <tr> <td>2</td> <td>Complete</td> </tr> </table>                                                                                                                                                                                                                                                                                                                                                                                    | 0 | Incomplete               | 1            | Unverified | 2                        | Complete                      |   |                         |                        |   |                         |                            |   |                         |                   |   |                         |                    |
| 0  | Incomplete                                                                                |                                                                                                                                                                                                                                                                                                                                |                                                                                                                                                                                                                                                                                                                                                                                                                                                                                                                                                        |   |                          |              |            |                          |                               |   |                         |                        |   |                         |                            |   |                         |                   |   |                         |                    |
| 1  | Unverified                                                                                |                                                                                                                                                                                                                                                                                                                                |                                                                                                                                                                                                                                                                                                                                                                                                                                                                                                                                                        |   |                          |              |            |                          |                               |   |                         |                        |   |                         |                            |   |                         |                   |   |                         |                    |
| 2  | Complete                                                                                  |                                                                                                                                                                                                                                                                                                                                |                                                                                                                                                                                                                                                                                                                                                                                                                                                                                                                                                        |   |                          |              |            |                          |                               |   |                         |                        |   |                         |                            |   |                         |                   |   |                         |                    |

Instrument: **Disposition And Outcomes** (disposition\_and\_outcomes)

[^ Collapse](#)

|    |                                                                                      |                                                                       |                                                                                                                                                                                                                                                                                                                                                                 |   |                   |                    |                   |                   |                                            |   |                   |                   |                                 |                   |       |
|----|--------------------------------------------------------------------------------------|-----------------------------------------------------------------------|-----------------------------------------------------------------------------------------------------------------------------------------------------------------------------------------------------------------------------------------------------------------------------------------------------------------------------------------------------------------|---|-------------------|--------------------|-------------------|-------------------|--------------------------------------------|---|-------------------|-------------------|---------------------------------|-------------------|-------|
| 86 | disposition                                                                          | Disposition                                                           | radio, Required<br><table border="1"> <tr><td>1</td><td>Discharged Home</td></tr> <tr><td>2</td><td>Regular Admission</td></tr> <tr><td>3</td><td>ICU Admission</td></tr> <tr><td>4</td><td>Expired in ED</td></tr> <tr><td>5</td><td>Transferred to another hospital</td></tr> </table>                                                                        | 1 | Discharged Home   | 2                  | Regular Admission | 3                 | ICU Admission                              | 4 | Expired in ED     | 5                 | Transferred to another hospital |                   |       |
| 1  | Discharged Home                                                                      |                                                                       |                                                                                                                                                                                                                                                                                                                                                                 |   |                   |                    |                   |                   |                                            |   |                   |                   |                                 |                   |       |
| 2  | Regular Admission                                                                    |                                                                       |                                                                                                                                                                                                                                                                                                                                                                 |   |                   |                    |                   |                   |                                            |   |                   |                   |                                 |                   |       |
| 3  | ICU Admission                                                                        |                                                                       |                                                                                                                                                                                                                                                                                                                                                                 |   |                   |                    |                   |                   |                                            |   |                   |                   |                                 |                   |       |
| 4  | Expired in ED                                                                        |                                                                       |                                                                                                                                                                                                                                                                                                                                                                 |   |                   |                    |                   |                   |                                            |   |                   |                   |                                 |                   |       |
| 5  | Transferred to another hospital                                                      |                                                                       |                                                                                                                                                                                                                                                                                                                                                                 |   |                   |                    |                   |                   |                                            |   |                   |                   |                                 |                   |       |
| 87 | ed_diagnosis                                                                         | Final ED Diagnosis                                                    | checkbox, Required<br><table border="1"> <tr><td>1</td><td>ed_diagnosis__1</td><td>COVID-19 Infection</td></tr> <tr><td>2</td><td>ed_diagnosis__2</td><td>Respiratory Infection, not confirmed COVID</td></tr> <tr><td>3</td><td>ed_diagnosis__3</td><td>SOB not specified</td></tr> <tr><td>4</td><td>ed_diagnosis__4</td><td>Other</td></tr> </table>         | 1 | ed_diagnosis__1   | COVID-19 Infection | 2                 | ed_diagnosis__2   | Respiratory Infection, not confirmed COVID | 3 | ed_diagnosis__3   | SOB not specified | 4                               | ed_diagnosis__4   | Other |
| 1  | ed_diagnosis__1                                                                      | COVID-19 Infection                                                    |                                                                                                                                                                                                                                                                                                                                                                 |   |                   |                    |                   |                   |                                            |   |                   |                   |                                 |                   |       |
| 2  | ed_diagnosis__2                                                                      | Respiratory Infection, not confirmed COVID                            |                                                                                                                                                                                                                                                                                                                                                                 |   |                   |                    |                   |                   |                                            |   |                   |                   |                                 |                   |       |
| 3  | ed_diagnosis__3                                                                      | SOB not specified                                                     |                                                                                                                                                                                                                                                                                                                                                                 |   |                   |                    |                   |                   |                                            |   |                   |                   |                                 |                   |       |
| 4  | ed_diagnosis__4                                                                      | Other                                                                 |                                                                                                                                                                                                                                                                                                                                                                 |   |                   |                    |                   |                   |                                            |   |                   |                   |                                 |                   |       |
| 88 | ed_diagnosis_other<br>Show the field ONLY if: [ed_diagnosis(4)] = '1'                | If Other, please specify:                                             | text, Required                                                                                                                                                                                                                                                                                                                                                  |   |                   |                    |                   |                   |                                            |   |                   |                   |                                 |                   |       |
| 89 | icu_upgrade<br>Show the field ONLY if: [disposition] = '2'                           | Was the patient upgraded to the ICU during their hospitalization?     | yesno, Required<br><table border="1"> <tr><td>1</td><td>Yes</td></tr> <tr><td>0</td><td>No</td></tr> </table>                                                                                                                                                                                                                                                   | 1 | Yes               | 0                  | No                |                   |                                            |   |                   |                   |                                 |                   |       |
| 1  | Yes                                                                                  |                                                                       |                                                                                                                                                                                                                                                                                                                                                                 |   |                   |                    |                   |                   |                                            |   |                   |                   |                                 |                   |       |
| 0  | No                                                                                   |                                                                       |                                                                                                                                                                                                                                                                                                                                                                 |   |                   |                    |                   |                   |                                            |   |                   |                   |                                 |                   |       |
| 90 | time_icu_upgrade<br>Show the field ONLY if: [icu_upgrade] = '1'                      | Date and Time of ICU Upgrade                                          | text (datetime_mdy), Required                                                                                                                                                                                                                                                                                                                                   |   |                   |                    |                   |                   |                                            |   |                   |                   |                                 |                   |       |
| 91 | hosp_diagnosis<br>Show the field ONLY if: [disposition] = '2' or [disposition] = '3' | Final Hospital Diagnosis                                              | checkbox, Required<br><table border="1"> <tr><td>1</td><td>hosp_diagnosis__1</td><td>COVID-19 Infection</td></tr> <tr><td>2</td><td>hosp_diagnosis__2</td><td>Respiratory Infection, not confirmed COVID</td></tr> <tr><td>3</td><td>hosp_diagnosis__3</td><td>SOB not specified</td></tr> <tr><td>4</td><td>hosp_diagnosis__4</td><td>Other</td></tr> </table> | 1 | hosp_diagnosis__1 | COVID-19 Infection | 2                 | hosp_diagnosis__2 | Respiratory Infection, not confirmed COVID | 3 | hosp_diagnosis__3 | SOB not specified | 4                               | hosp_diagnosis__4 | Other |
| 1  | hosp_diagnosis__1                                                                    | COVID-19 Infection                                                    |                                                                                                                                                                                                                                                                                                                                                                 |   |                   |                    |                   |                   |                                            |   |                   |                   |                                 |                   |       |
| 2  | hosp_diagnosis__2                                                                    | Respiratory Infection, not confirmed COVID                            |                                                                                                                                                                                                                                                                                                                                                                 |   |                   |                    |                   |                   |                                            |   |                   |                   |                                 |                   |       |
| 3  | hosp_diagnosis__3                                                                    | SOB not specified                                                     |                                                                                                                                                                                                                                                                                                                                                                 |   |                   |                    |                   |                   |                                            |   |                   |                   |                                 |                   |       |
| 4  | hosp_diagnosis__4                                                                    | Other                                                                 |                                                                                                                                                                                                                                                                                                                                                                 |   |                   |                    |                   |                   |                                            |   |                   |                   |                                 |                   |       |
| 92 | hosp_diagnosis_other<br>Show the field ONLY if: [hosp_diagnosis(4)] = '1'            | If Other, please specify:                                             | text, Required                                                                                                                                                                                                                                                                                                                                                  |   |                   |                    |                   |                   |                                            |   |                   |                   |                                 |                   |       |
| 93 | pulmonary_embolism                                                                   | Was the patient diagnosed with a PE during this visit?                | yesno, Required<br><table border="1"> <tr><td>1</td><td>Yes</td></tr> <tr><td>0</td><td>No</td></tr> </table>                                                                                                                                                                                                                                                   | 1 | Yes               | 0                  | No                |                   |                                            |   |                   |                   |                                 |                   |       |
| 1  | Yes                                                                                  |                                                                       |                                                                                                                                                                                                                                                                                                                                                                 |   |                   |                    |                   |                   |                                            |   |                   |                   |                                 |                   |       |
| 0  | No                                                                                   |                                                                       |                                                                                                                                                                                                                                                                                                                                                                 |   |                   |                    |                   |                   |                                            |   |                   |                   |                                 |                   |       |
| 94 | pe_date<br>Show the field ONLY if: [pulmonary_embolism] = '1'                        | Date of pulmonary embolism diagnosis                                  | text (date_mdy), Required                                                                                                                                                                                                                                                                                                                                       |   |                   |                    |                   |                   |                                            |   |                   |                   |                                 |                   |       |
| 95 | dvt                                                                                  | Was the patient diagnosed with a DVT during this visit?               | yesno, Required<br><table border="1"> <tr><td>1</td><td>Yes</td></tr> <tr><td>0</td><td>No</td></tr> </table>                                                                                                                                                                                                                                                   | 1 | Yes               | 0                  | No                |                   |                                            |   |                   |                   |                                 |                   |       |
| 1  | Yes                                                                                  |                                                                       |                                                                                                                                                                                                                                                                                                                                                                 |   |                   |                    |                   |                   |                                            |   |                   |                   |                                 |                   |       |
| 0  | No                                                                                   |                                                                       |                                                                                                                                                                                                                                                                                                                                                                 |   |                   |                    |                   |                   |                                            |   |                   |                   |                                 |                   |       |
| 96 | dvt_date<br>Show the field ONLY if: [dvt] = '1'                                      | Date of DVT diagnosis                                                 | text (date_mdy), Required                                                                                                                                                                                                                                                                                                                                       |   |                   |                    |                   |                   |                                            |   |                   |                   |                                 |                   |       |
| 97 | limb_ischemia                                                                        | Was the patient diagnosed with acute limb ischemia during this visit? | yesno, Required<br><table border="1"> <tr><td>1</td><td>Yes</td></tr> <tr><td>0</td><td>No</td></tr> </table>                                                                                                                                                                                                                                                   | 1 | Yes               | 0                  | No                |                   |                                            |   |                   |                   |                                 |                   |       |
| 1  | Yes                                                                                  |                                                                       |                                                                                                                                                                                                                                                                                                                                                                 |   |                   |                    |                   |                   |                                            |   |                   |                   |                                 |                   |       |
| 0  | No                                                                                   |                                                                       |                                                                                                                                                                                                                                                                                                                                                                 |   |                   |                    |                   |                   |                                            |   |                   |                   |                                 |                   |       |
| 98 | date_limb_ischemia<br>Show the field ONLY if: [limb_ischemia] = '1'                  | Date of acute limb ischemia diagnosis                                 | text (date_mdy), Required                                                                                                                                                                                                                                                                                                                                       |   |                   |                    |                   |                   |                                            |   |                   |                   |                                 |                   |       |



|                                        |                                                                                  |                                                                           |                                                                                                                                                                                                   |   |            |   |            |   |          |   |              |
|----------------------------------------|----------------------------------------------------------------------------------|---------------------------------------------------------------------------|---------------------------------------------------------------------------------------------------------------------------------------------------------------------------------------------------|---|------------|---|------------|---|----------|---|--------------|
| 99                                     | mesenteric_ischemia                                                              | Was the patient diagnosed with mesenteric ischemia during this visit?     | yesno, Required<br><table border="1"> <tr><td>1</td><td>Yes</td></tr> <tr><td>0</td><td>No</td></tr> </table>                                                                                     | 1 | Yes        | 0 | No         |   |          |   |              |
| 1                                      | Yes                                                                              |                                                                           |                                                                                                                                                                                                   |   |            |   |            |   |          |   |              |
| 0                                      | No                                                                               |                                                                           |                                                                                                                                                                                                   |   |            |   |            |   |          |   |              |
| 100                                    | mesenteric_ischemia_date<br>Show the field ONLY if: [mesenteric_ischemia] = '1'  | Date of mesenteric ischemia diagnosis                                     | text (date_mdy), Required                                                                                                                                                                         |   |            |   |            |   |          |   |              |
| 101                                    | stroke                                                                           | Was the patient diagnosed with a stroke during this visit?                | yesno, Required<br><table border="1"> <tr><td>1</td><td>Yes</td></tr> <tr><td>0</td><td>No</td></tr> </table>                                                                                     | 1 | Yes        | 0 | No         |   |          |   |              |
| 1                                      | Yes                                                                              |                                                                           |                                                                                                                                                                                                   |   |            |   |            |   |          |   |              |
| 0                                      | No                                                                               |                                                                           |                                                                                                                                                                                                   |   |            |   |            |   |          |   |              |
| 102                                    | stroke_date<br>Show the field ONLY if: [stroke] = '1'                            | Date of stroke diagnosis                                                  | text (date_mdy)                                                                                                                                                                                   |   |            |   |            |   |          |   |              |
| 103                                    | mi                                                                               | Was the patient diagnosed with a myocardial infarction during this visit? | yesno, Required<br><table border="1"> <tr><td>1</td><td>Yes</td></tr> <tr><td>0</td><td>No</td></tr> </table>                                                                                     | 1 | Yes        | 0 | No         |   |          |   |              |
| 1                                      | Yes                                                                              |                                                                           |                                                                                                                                                                                                   |   |            |   |            |   |          |   |              |
| 0                                      | No                                                                               |                                                                           |                                                                                                                                                                                                   |   |            |   |            |   |          |   |              |
| 104                                    | mi_date<br>Show the field ONLY if: [mi] = '1'                                    | Date of MI diagnosis                                                      | text (date_mdy)                                                                                                                                                                                   |   |            |   |            |   |          |   |              |
| 105                                    | mi_type<br>Show the field ONLY if: [mi] = '1'                                    | Type of MI                                                                | radio, Required<br><table border="1"> <tr><td>1</td><td>Type I</td></tr> <tr><td>2</td><td>Type II</td></tr> <tr><td>3</td><td>Unknown</td></tr> </table>                                         | 1 | Type I     | 2 | Type II    | 3 | Unknown  |   |              |
| 1                                      | Type I                                                                           |                                                                           |                                                                                                                                                                                                   |   |            |   |            |   |          |   |              |
| 2                                      | Type II                                                                          |                                                                           |                                                                                                                                                                                                   |   |            |   |            |   |          |   |              |
| 3                                      | Unknown                                                                          |                                                                           |                                                                                                                                                                                                   |   |            |   |            |   |          |   |              |
| 106                                    | otherclottingevent                                                               | Was the patient diagnosed with any other type of clotting event?          | yesno, Required<br><table border="1"> <tr><td>1</td><td>Yes</td></tr> <tr><td>0</td><td>No</td></tr> </table>                                                                                     | 1 | Yes        | 0 | No         |   |          |   |              |
| 1                                      | Yes                                                                              |                                                                           |                                                                                                                                                                                                   |   |            |   |            |   |          |   |              |
| 0                                      | No                                                                               |                                                                           |                                                                                                                                                                                                   |   |            |   |            |   |          |   |              |
| 107                                    | otherclottingevent_date<br>Show the field ONLY if: [otherclottingevent] = '1'    | Date of other clotting event                                              | text (date_mdy), Required                                                                                                                                                                         |   |            |   |            |   |          |   |              |
| 108                                    | otherclottingevent_specify<br>Show the field ONLY if: [otherclottingevent] = '1' | Specify type of other clotting event                                      | text                                                                                                                                                                                              |   |            |   |            |   |          |   |              |
| 109                                    | quarantine                                                                       | At discharge, was the patient told to self-quarantine?                    | yesno, Required<br><table border="1"> <tr><td>1</td><td>Yes</td></tr> <tr><td>0</td><td>No</td></tr> </table>                                                                                     | 1 | Yes        | 0 | No         |   |          |   |              |
| 1                                      | Yes                                                                              |                                                                           |                                                                                                                                                                                                   |   |            |   |            |   |          |   |              |
| 0                                      | No                                                                               |                                                                           |                                                                                                                                                                                                   |   |            |   |            |   |          |   |              |
| 110                                    | death                                                                            | Did patient die during this encounter?                                    | yesno, Required<br><table border="1"> <tr><td>1</td><td>Yes</td></tr> <tr><td>0</td><td>No</td></tr> </table>                                                                                     | 1 | Yes        | 0 | No         |   |          |   |              |
| 1                                      | Yes                                                                              |                                                                           |                                                                                                                                                                                                   |   |            |   |            |   |          |   |              |
| 0                                      | No                                                                               |                                                                           |                                                                                                                                                                                                   |   |            |   |            |   |          |   |              |
| 111                                    | code_status                                                                      | Patient code status (check at discharge)                                  | radio, Required<br><table border="1"> <tr><td>1</td><td>Full Code</td></tr> <tr><td>2</td><td>DNR</td></tr> <tr><td>3</td><td>DNR/DNI</td></tr> <tr><td>4</td><td>comfort care</td></tr> </table> | 1 | Full Code  | 2 | DNR        | 3 | DNR/DNI  | 4 | comfort care |
| 1                                      | Full Code                                                                        |                                                                           |                                                                                                                                                                                                   |   |            |   |            |   |          |   |              |
| 2                                      | DNR                                                                              |                                                                           |                                                                                                                                                                                                   |   |            |   |            |   |          |   |              |
| 3                                      | DNR/DNI                                                                          |                                                                           |                                                                                                                                                                                                   |   |            |   |            |   |          |   |              |
| 4                                      | comfort care                                                                     |                                                                           |                                                                                                                                                                                                   |   |            |   |            |   |          |   |              |
| 112                                    | disposition_and_outcomes_complete                                                | Section Header: <i>Form Status</i><br>Complete?                           | dropdown<br><table border="1"> <tr><td>0</td><td>Incomplete</td></tr> <tr><td>1</td><td>Unverified</td></tr> <tr><td>2</td><td>Complete</td></tr> </table>                                        | 0 | Incomplete | 1 | Unverified | 2 | Complete |   |              |
| 0                                      | Incomplete                                                                       |                                                                           |                                                                                                                                                                                                   |   |            |   |            |   |          |   |              |
| 1                                      | Unverified                                                                       |                                                                           |                                                                                                                                                                                                   |   |            |   |            |   |          |   |              |
| 2                                      | Complete                                                                         |                                                                           |                                                                                                                                                                                                   |   |            |   |            |   |          |   |              |
| Instrument: <b>Followup</b> (followup) |                                                                                  |                                                                           | <a href="#">^ Collapse</a>                                                                                                                                                                        |   |            |   |            |   |          |   |              |
| 113                                    | return_subjectid                                                                 | Subject Number of Return Visit #1 in Redcap                               | text, Required                                                                                                                                                                                    |   |            |   |            |   |          |   |              |
| 114                                    | return_subjectid_2                                                               | Subject Number of Return Visit #2 in Redcap                               | text                                                                                                                                                                                              |   |            |   |            |   |          |   |              |

|   |            |                    |                                                 |                                                                                                                                                     |   |            |   |            |   |          |
|---|------------|--------------------|-------------------------------------------------|-----------------------------------------------------------------------------------------------------------------------------------------------------|---|------------|---|------------|---|----------|
|   | 115        | return_subjectid_3 | Subject Number of Return Visit #3 in Redcap     | text                                                                                                                                                |   |            |   |            |   |          |
|   | 116        | return_subjectid_4 | Subject Number of Return Visit #4 in Redcap     | text                                                                                                                                                |   |            |   |            |   |          |
|   | 117        | followup_complete  | Section Header: <i>Form Status</i><br>Complete? | dropdown <table border="1"><tr><td>0</td><td>Incomplete</td></tr><tr><td>1</td><td>Unverified</td></tr><tr><td>2</td><td>Complete</td></tr></table> | 0 | Incomplete | 1 | Unverified | 2 | Complete |
| 0 | Incomplete |                    |                                                 |                                                                                                                                                     |   |            |   |            |   |          |
| 1 | Unverified |                    |                                                 |                                                                                                                                                     |   |            |   |            |   |          |
| 2 | Complete   |                    |                                                 |                                                                                                                                                     |   |            |   |            |   |          |
